# Supplementary material for: Optimizing Hydroxychloroquine Dosing for Patients With COVID‐19: An Integrative Modeling Approach for Effective Drug Repurposing
Source: PubMed Central journal article supplement — Clin Pharmacol Ther. 2020 May 12;108(2):253–63. doi: 10.1002/cpt.1856 (PMC7262072; doi:10.1002/cpt.1856), 2020-05-12
Supplement: CPT-108-253-s001.pdf [file CPT-108-253-s001.pdf]

**Table S1.** Parameter estimates for the *in vitro* and clinical PK/PD model.

| <b>Model</b>           | <b>Parameter</b>                                            | <b>Estimate</b> | <b>RSE (%)*</b> |
|------------------------|-------------------------------------------------------------|-----------------|-----------------|
| <b><i>in vitro</i></b> | MAX <sub>virus</sub> (viral load (1/log <sub>2</sub> (CT))) | 0.29            | 0               |
|                        | k <sub>g</sub> (d <sup>-1</sup> )                           | 0.577           | 0               |
|                        | k <sub>d</sub> (d <sup>-1</sup> )                           | 0.0631          | 1               |
| <b>Clinical</b>        | MAX <sub>virus</sub> (viral load (1/log <sub>2</sub> (CT))) | 0.256 (FIX)     | -               |
|                        | k <sub>g</sub> (d <sup>-1</sup> )                           | 0.018           | 41.29           |
|                        | IIV <sub>k<sub>g</sub></sub> (%)                            | 59.75           | 47.71           |
|                        | k <sub>d</sub> (d <sup>-1</sup> )                           | 0.00305         | 29.58           |
|                        | sl (d <sup>-1</sup> )                                       | 0.00434         | 56.58           |
|                        | Proportional error (%)                                      | 4.35            | 13.81           |

\*RSE - Residual Standard Errors, obtained after 500 bootstrap replications.

MAX<sub>virus</sub> – maximum viral load, k<sub>g</sub> – first order rate constant of virus formation, k<sub>d</sub> – first order rate constant of viral elimination, IIV – Inter-Individual Variability, sl – slope of the drug effect
