# Supplementary material for: Optimizing Hydroxychloroquine Dosing for Patients With COVID‐19: An Integrative Modeling Approach for Effective Drug Repurposing
Source: PubMed Central journal article supplement — Clin Pharmacol Ther. 2020 May 12;108(2):253–63. doi: 10.1002/cpt.1856 (PMC7262072; doi:10.1002/cpt.1856), 2020-05-12
Supplement: CPT-108-253-s002.pdf [file CPT-108-253-s002.pdf]

**Table S2.** Summary of model outputs for a range possible dosing regimens.

| <b>Regimen</b>                                             | <b>PK simulations above EC50 at day 5</b> | <b>% of adults with (baseline QTc of 394 ± 30SD) with QTc &gt;500ms</b> | <b>Median predicted % of patients with positive % PCR</b> |
|------------------------------------------------------------|-------------------------------------------|-------------------------------------------------------------------------|-----------------------------------------------------------|
| <b>200 mg BID 5 days</b>                                   | no                                        | 0.2                                                                     | 59.03                                                     |
| <b>200 mg BID 7 days</b>                                   | no                                        | 0.4                                                                     | 48.56                                                     |
| <b>200 mg BID 10 days</b>                                  | no                                        | 0.4                                                                     | 40.69                                                     |
| <b>200 mg TID 10 days</b>                                  | no                                        | 2.1                                                                     | 28.94                                                     |
| <b>400 mg BID 5 days</b>                                   | no                                        | 3.1                                                                     | 36.39                                                     |
| <b>400 mg BID 7 days</b>                                   | no                                        | 5                                                                       | 27.37                                                     |
| <b>400 mg BID 10 days</b>                                  | no                                        | 7.3                                                                     | 20.68                                                     |
| <b>600 mg BID 5 days</b>                                   | yes                                       | 10.5                                                                    | 22.18                                                     |
| <b>600 mg BID 7 days</b>                                   | yes                                       | 16.1                                                                    | 15.5                                                      |
| <b>600 mg BID 10 days</b>                                  | yes                                       | 25.2                                                                    | 10.77                                                     |
| <b>800 mg BID 5 days</b>                                   | yes                                       | 28.6                                                                    | 13.61                                                     |
| <b>800 mg BID 7 days</b>                                   | yes                                       | 36.9                                                                    | 9.07                                                      |
| <b>800 mg BID 10 days</b>                                  | yes                                       | 50.2                                                                    | 5.78                                                      |
| <b>800 mg BID 1 day + 400 mg BID maintenance (4 days)</b>  | yes                                       | 4.4                                                                     | 31                                                        |
| <b>800 mg BID 2 day + 400 mg BID maintenance (3 days)</b>  | yes                                       | 6.1                                                                     | 26                                                        |
| <b>800 mg BID 3 day + 400 mg BID maintenance (2 days)</b>  | yes                                       | 14.7                                                                    | 24                                                        |
| <b>800 mg BID 2 days + 400 mg BID maintenance (5 days)</b> | yes                                       | 10.2                                                                    | 21                                                        |
| <b>800 mg BID 1 day + 400 mg BID maintenance (6 days)</b>  | yes                                       | 7.3                                                                     | 24                                                        |
| <b>600 mg BID 2 days + 200 mg TID maintenance (5 days)</b> | no                                        | 2.7                                                                     | 30                                                        |
| <b>600 mg BID 1 day + 200 mg TID maintenance (6 days)</b>  | no                                        | 1.2                                                                     | 33                                                        |
