# Supplementary material for: Optimizing Hydroxychloroquine Dosing for Patients With COVID‐19: An Integrative Modeling Approach for Effective Drug Repurposing
Source: PubMed Central journal article supplement — Clin Pharmacol Ther. 2020 May 12;108(2):253–63. doi: 10.1002/cpt.1856 (PMC7262072; doi:10.1002/cpt.1856), 2020-05-12
Supplement: CPT-108-253-s003.pdf [file CPT-108-253-s003.pdf]

**Table S3.** Percent of patients with QT interval predicted to be >500 ms stratified by baseline QTc

| Regimen           | Population                       | Baseline QTc (ms) | n in each group | % of patients with QTc >500ms* |
|-------------------|----------------------------------|-------------------|-----------------|--------------------------------|
| 400 mg BID 5 days | Baseline QTc of 394ms $\pm$ 30SD | <400              | 569             | 0.2                            |
|                   |                                  | 400-410           | 131             | 0.0                            |
|                   |                                  | 411-420           | 94              | 1.0                            |
|                   |                                  | 421-430           | 88              | 1.1                            |
|                   |                                  | 431-440           | 53              | 9.4                            |
|                   |                                  | 441-450           | 28              | 14                             |
|                   |                                  | >450              | 37              | 54                             |
|                   | Baseline QTc of 420 $\pm$ 30SD   | <400              | 239             | 0.0                            |
|                   |                                  | 400-410           | 124             | 0.0                            |
|                   |                                  | 411-420           | 142             | 1.4                            |
|                   |                                  | 421-430           | 130             | 2.3                            |
|                   |                                  | 431-440           | 119             | 2.5                            |
|                   |                                  | 441-450           | 84              | 19                             |
|                   |                                  | >450              | 162             | 54                             |
| 400 mg BID 7 days | Baseline QTc of 394ms $\pm$ 30SD | <400              | 569             | 0.4                            |
|                   |                                  | 400-410           | 131             | 0.8                            |
|                   |                                  | 411-420           | 94              | 2.1                            |
|                   |                                  | 421-430           | 88              | 6.8                            |
|                   |                                  | 431-440           | 53              | 9.4                            |
|                   |                                  | 441-450           | 28              | 28                             |
|                   |                                  | >450              | 37              | 73                             |
|                   | Baseline QTc of 420 $\pm$ 30SD   | <400              | 239             | 0.4                            |
|                   |                                  | 400-410           | 124             | 2.4                            |
|                   |                                  | 411-420           | 142             | 0.0                            |
|                   |                                  | 421-430           | 120             | 5.4                            |
|                   |                                  | 431-440           | 119             | 20                             |
|                   |                                  | 441-450           | 84              | 31                             |
|                   |                                  | >450              | 162             | 76                             |

Each virtual patient population had 1000 individuals

\*% is calculated based on the number of patients in each baseline bin
