# Supplementary material for: Optimizing Hydroxychloroquine Dosing for Patients With COVID‐19: An Integrative Modeling Approach for Effective Drug Repurposing
Source: PubMed Central journal article supplement — Clin Pharmacol Ther. 2020 May 12;108(2):253–63. doi: 10.1002/cpt.1856 (PMC7262072; doi:10.1002/cpt.1856), 2020-05-12
Supplement: CPT-108-253-s004.pdf [file CPT-108-253-s004.pdf]

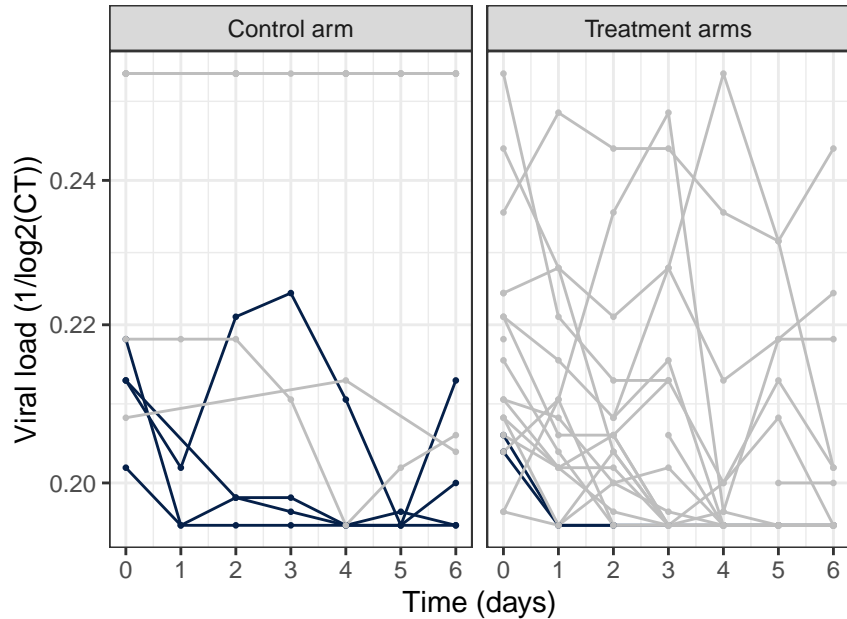

- Asymptomatic
- URT/LRTI

Figure S1: Individual viral load data shown by clinical status, differentiating the asymptomatic patient profiles. URTI: upper tract respiratory infection, LRTI: lower tract respiratory infection
