# Supplementary material for: Optimizing Hydroxychloroquine Dosing for Patients With COVID‐19: An Integrative Modeling Approach for Effective Drug Repurposing
Source: PubMed Central journal article supplement — Clin Pharmacol Ther. 2020 May 12;108(2):253–63. doi: 10.1002/cpt.1856 (PMC7262072; doi:10.1002/cpt.1856), 2020-05-12
Supplement: CPT-108-253-s007.pdf [file CPT-108-253-s007.pdf]

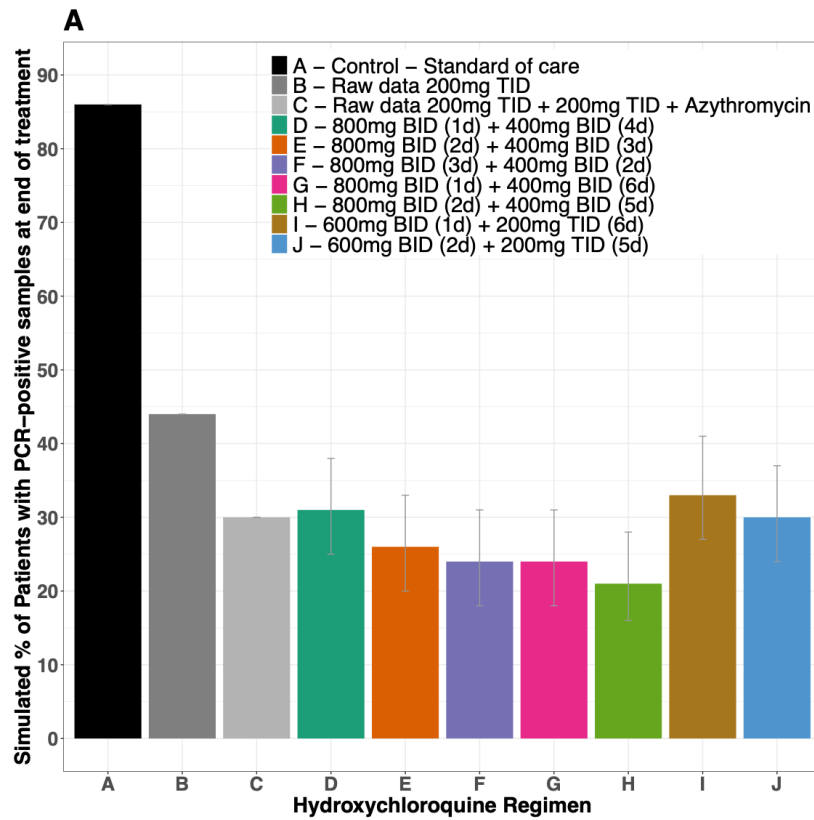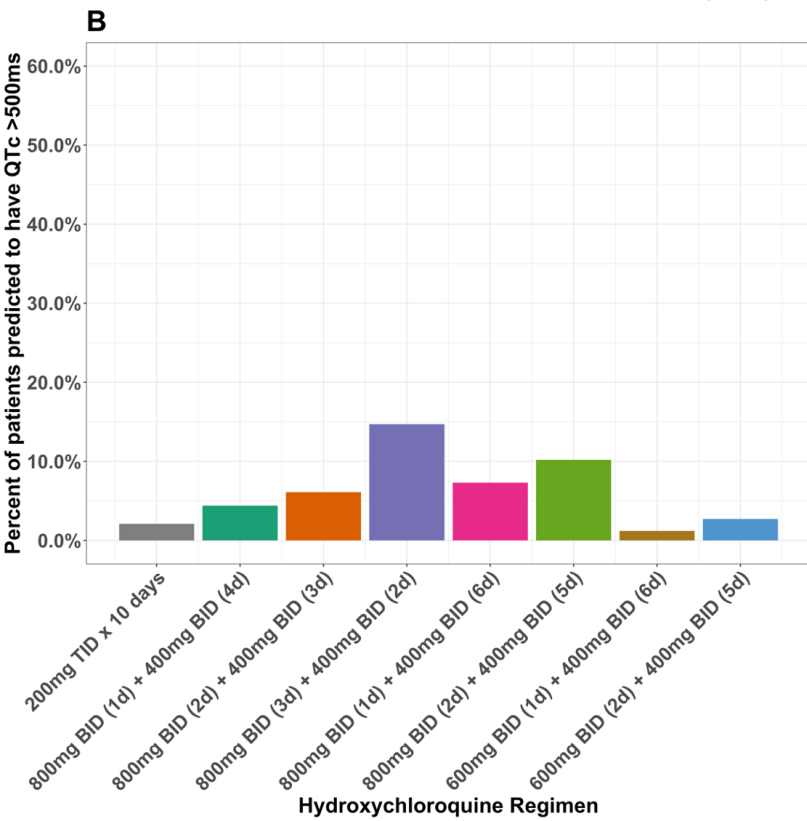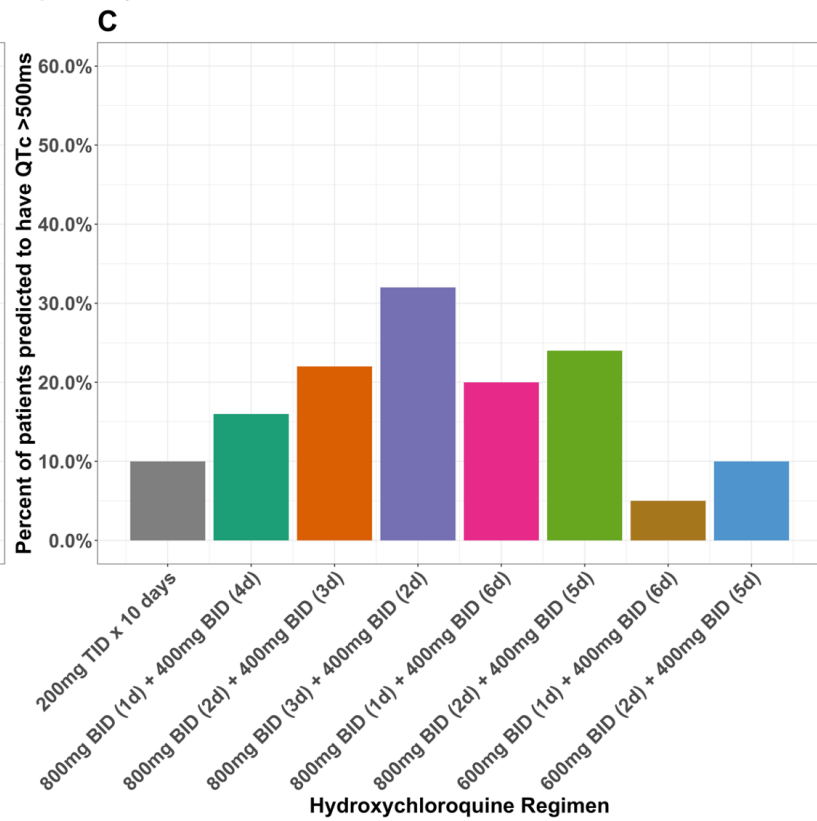

Figure S4: Simulated proportion of adults with detectable viral loads at the end of treatment, stratified by regimen, when combining different loading and maintenance doses. B) Predicted percent of adults with (baseline QTc of  $394 + 30SD$ ) a QTc over 500msec for each regimen with a loading dose. C) Predicted percent of adults with (baseline QTc of  $420 + 30SD$ ) a QTc over 500msec for each regimen with a loading dose.
