# Supplementary figures and images for: Optimizing Hydroxychloroquine Dosing for Patients With COVID‐19: An Integrative Modeling Approach for Effective Drug Repurposing
Source: PubMed Central journal article supplement — Clin Pharmacol Ther. 2020 May 12;108(2):253–63. doi: 10.1002/cpt.1856 (PMC7262072; doi:10.1002/cpt.1856), 2020-05-12

A

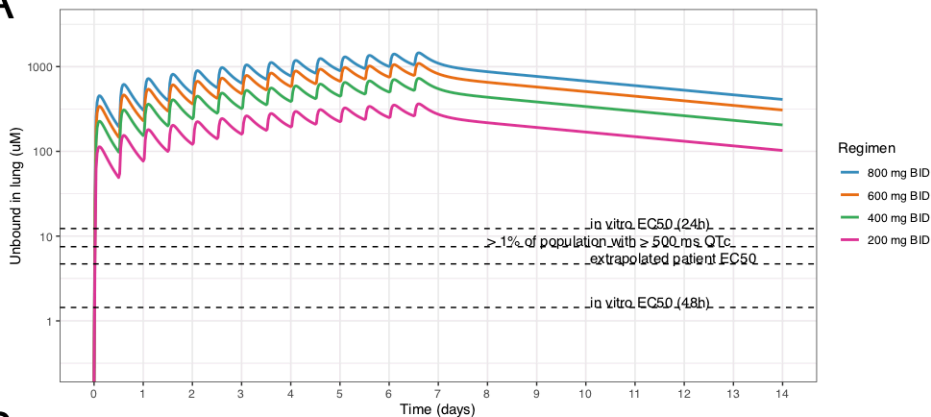

B

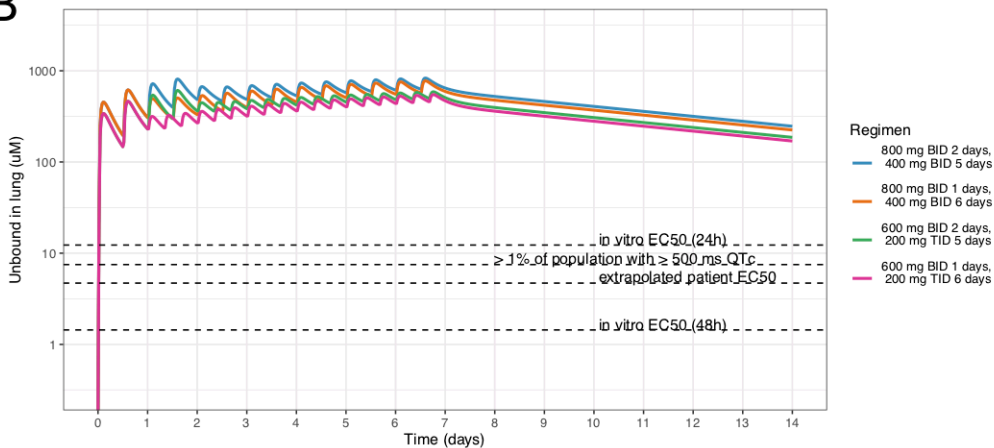

Figure S3: Simulated unbound lung concentration corresponding to regimens shown in Figure 5.

Supplement: CPT-108-253-s005.pdf [file CPT-108-253-s005.pdf]
